# Supplementary material
Source: PubMed Central journal article supplement (PMC1691084)
Supplement: 12204127s01.pdf [file 12204127s01.pdf]

This is an electronic appendix to the paper by Fok *et al.* (2002) Inferring the phylogeny of disjunct populations of the Azure-winged Magpie *Cyanopica cyanus* from mitochondrial control region sequences. *Proc. R. Soc. Lond. B* **269**, 1671-1679.

Electronic appendices are referred with the text. However, no attempt has been made to impose a uniform editorial style on the electronic appendices.

Electronic appendix A.

Table 1: Azure-winged Magpie specimen used in this study. Tissue type is denoted as B = blood, F = feathers and P = foot-pad samples. Missing fragment(s) of control region sequences correspond to the codes given in Figure A1. BMNH = The Natural History Museum, Tring and BMAM = The Natural History Museum, Beijing.

| Subspecies              | Tissue Type | Reference Number | Missing Fragment(s) | Origin                      | Collection Date | N   | Museum Registration Number |
|-------------------------|-------------|------------------|---------------------|-----------------------------|-----------------|-----|----------------------------|
| <b>Fresh samples</b>    |             |                  |                     |                             |                 |     |                            |
|                         | B           | S 1 - S 117      |                     | South of Spain              | 1991            | 117 |                            |
|                         | B           | C 1 - C 6        |                     | Beijing                     | 2000            | 6   |                            |
|                         | F           | J 1 - J 6        |                     | Japan                       | 2000            | 6   |                            |
| <b>Museum samples</b>   |             |                  |                     |                             |                 |     |                            |
| <i>C.c. cyanus</i>      | P           | 1                |                     | Sha Ho, Mongolia            | 20/05/1897      | 3   | BMNH 1898.11.15.6          |
|                         | P           | 2                | B, E, H             | Transbaikalia, Mongolia     | 20/05/1897      |     | BMNH 1898.11.15.7          |
|                         | P           | 3                | All but H           | Sha Ho, Mongolia            | 18/02/1872      |     | BMNH 1875.3.15.9           |
| <i>C.c. pallescens</i>  | P           | 4                | H                   | Amur Bai, E. Siberia        | 20/05/1897      | 3   | BMNH 1897.6.1.168          |
|                         | P           | 5                |                     | Dailing                     | 12/06/1963      |     | BMAM 52764                 |
|                         | P           | 6                | H                   | Dailing                     | 14/06/1963      |     | BMAM 52765                 |
| <i>C.c. stegmanni</i>   | P           | 7                |                     | Jilin, China                | 31/08/1905      | 2   | BMAM 06200                 |
|                         | P           | 8                |                     | Jilin, China                | 31/07/1963      |     | BMAM 06199                 |
| <i>C.c. koreensis</i>   | P           | 9                |                     | 50mile NW of Seoul, Korea   | 04/11/1906      | 3   | BMNH 1907.12.17.402        |
|                         | P           | 10               |                     | 60mile NE Mokpho, Korea     | 17/10/1905      |     | BMNH 1907.12.17.404        |
|                         | P           | 11               |                     | 55mile NE Seoul, Korea      | 28/11/1906      |     | BMNH 1907.12.17.405        |
| <i>C.c. japonica</i>    | P           | 12               |                     | Musashi, Japan              | 1924            | 2   | BMNH 1929.6.23.3           |
|                         | P           | 13               | B, H                | Yokohama, Japan             | 02/1886         |     | BMNH 1907.12.20.201        |
| <i>C.c. swinhoei</i>    | P           | 14               |                     | Shanghai, China             | 07/10/1900      | 3   | BMNH 1914.8.10.115         |
|                         | P           | 15               |                     | Nuoergai                    | 09/07/1961      |     | BMAM 40026                 |
|                         | P           | 16               |                     | Huangpushan                 | 08/06/1965      |     | BMAM 53095                 |
| <i>C.c. interposita</i> | P           | 17               |                     | Tai Pai Shan, China         | 25/10/1905      | 5   | BMNH 1965.M.19236          |
|                         | P           | 18               | B, G, H             | Haidian                     | 10/10/1957      |     | BMAM 27512                 |
|                         | P           | 19               | All                 | Laishui, Hebei Province     | 15/11/1932      |     | BMAM 06129                 |
|                         | P           | 20               | All                 | Xinan                       | 11/12/1932      |     | BMAM 06208                 |
|                         | P           | 21               | D                   | North Kansu, China          | 12/11/1927      |     | BMNH 1965.M.19237          |
| <i>C.c. kansuensis</i>  | P           | 22               |                     | Guinan County               | 20/08/1959      | 3   | BMAM 36889                 |
|                         | P           | 23               |                     | Qinghai, China              | 19/05/1959      |     | BMAM 36872                 |
|                         | P           | 24               |                     | Haidian                     | 18/07/1959      |     | BMAM 36892                 |
| <i>C.c. gili</i>        | P           | 25               | All but C,D         | Espantes, Setubal, Portugal | 20/04/1932      | 3   | BMNH 1941.5.30.2784        |
|                         | P           | 26               |                     | Languna Albuera, Portugal   | 14/04/1934      |     | BMNH 1940.Whi.1.1071       |
|                         | P           | 27               |                     | Rincon, Caudeleda, Spain    | 31/10/1922      |     | BMNH 1934.1.1.3704         |
| <i>C.c. cooki</i>       | P           | 28               | H                   | Coria, S. Spain             | 23/02/1896      | 4   | BMNH 1930.3.5.57           |
|                         | P           | 29               |                     | Madrid, Spain               | 06/1863         |     | BMNH 72.11.4.60            |
|                         | P           | 30               |                     | N. Coria, Seville, Spain    | 16/04/1898      |     | BMNH 1934.1.1.3698         |
|                         | P           | 31               |                     | Coria, S. Spain             | 23/02/1896      |     | BMNH 1930.3.5.59           |
|                         | P           | 32               | B                   | Valencia, Spain             | 26/06/????      |     | BMNH 1934.1.1.3717         |

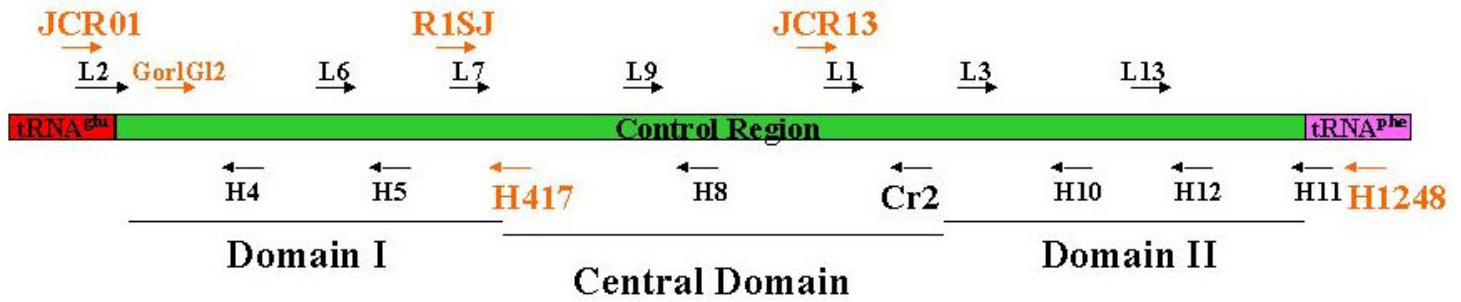

| Code | Primer   | Sequence (5' 3')                     | Length | Primer reference       |
|------|----------|--------------------------------------|--------|------------------------|
|      | JCR01    | (C/T)GGCCTGAAAAACAT(G/C)GTT          |        | Saunders, Edwards 2000 |
|      | H417     | AGTAGCTCGGTTCTCGTGAG                 |        | Tarr 1995              |
|      | R1SJ     | CTCCAAGCCAGAGAACCTG                  |        | Saunders, Edwards 2000 |
|      | Cr2      | CACTGATGCACTTTGACCACAT               |        | This paper             |
|      | JCR13    | TGTTTTCTTTTTGGGGTCTCTTCAATAAGC       |        | Saunders, Edwards 2000 |
|      | H1248    | AGCATGACACTGAAGATG                   |        | Tarr 1995              |
| A    | L2       | CGGGCTGAAAAACCAT(C/G/T)GTT           | 173    | This paper             |
|      | H4       | AGTAATGCAAGACCTAACTA                 |        | This paper             |
| B    | GorIGI2  | CATACAATTCTCGTCCACAT                 | 260    | Tarr 1995              |
|      | H5       | TACGAGGAATATCCTAGTAC                 |        | This paper             |
| C    | L6       | AGATCGATAGTGTTCAC                    | 196    | This paper             |
|      | H417     | CTCACGAGAACCGAGCTACT                 |        | Tarr 1995              |
| D    | L7       | CAAGGACTCCAAGCCAGAG                  | 212    | This paper             |
|      | H8       | TGCTCTTCACAGACGCATAT                 |        | This paper             |
| E    | L9       | GCGCCTCTGGTTCCTATTTTCAGG             | 310    | This paper             |
|      | Cr2      | CACTGATGCACTTTGACCACAT               |        | This paper             |
| F    | L1       | GTACCTGGTGTGCATGGTTGT                | 268    | This paper             |
|      | H10      | ATGRTTTGGACAATCTAGG                  |        | This paper             |
| G    | L3       | CTAGGAATTSTTACCTAAACC                | 275    | This paper             |
|      | H12      | GCATTAATC(G/A)AT(G/A)TTTTTATCGTG     |        | This paper             |
| H    | L13      | C(G/T)TGATTTTTAATCGTTATTAA(C/T)TTAAC | 259    | This paper             |
|      | H11      | CAAAGCATGACTCTGAAGA                  |        | This paper             |
| I    | L6 / H8  | As above                             | 343    | As above               |
| J    | L3 / H11 | As above                             | 459    | As above               |

Figure 4: Amplification and sequencing primers used in this study. Codes correspond to the missing fragments described in table A1.

Saunders, M.A. & Edwards, S.V. 2000 Dynamics and Phylogenetic Implications of MtDNA Control Region Sequences in New World Jays (Aves: Corvidae). *J. Mol. Evol.* 51, 97-109.
